# Supplementary material for: Rosai dorfman disease of the orbit
Source: Springer Nature journal article supplement (doi:10.1186/1756-8722-1-7), 2008-06-28
Supplement: Additional file 2 [file 1756-8722-1-7-s2.doc]

Table 2. Clinical manifestations of Rosai-Dorfman disease

| **Anatomic Location** | **Frequency5** | **Clinical Manifestation** |
| --- | --- | --- |
| Lymph nodes | 87% | Massive painless lymphadenopathy, unilateral or bilateral, most commonly affecting cervical lymph nodes |
| Skin and Soft Tissue | 16% | Cutaneous lesions (maculopapular rash, xantomatous lesion, reddish or bluish mass), or subcutaneous nodules |
| Nasal cavity and Paranasal sinus | 16% | Mucosal thickening, polyp, infiltrative paranasal sinus mass |
| Eye and adnexa | 11% | Orbital or eyelid mass |
| Bone | 11% | Osteolytic lesions of axial or appendicular skeleton with or without sclerosis |
| Salivary gland | 7% | Bilateral parotid or submadibular gland mass |
| Central nervous system | 7% | Intracranial, epidura, dural or spinal mass |
| Oral cavity | 4% | Infiltrative mass of soft or hard palate, diffuse mucosal thickening, papillomatosis or gingival hypertrophy |
| Kidney and Genitourinary tract | 3% | Renal mass with urinary obstruction, testicular, scrotal or ependymal mass, penile edema |
| Respiratory tract | 3% | Laryngeal obstruction, vocal cord thickening with hoarseness of voice |
| Liver | 1% | Hepatomegaly, military infiltration, mass |
| Tonsil | 1% | Enlargement |
| Breast | <1% | Subcutaneous nodules |
| Gastrointestinal tract | <1% | Mucosal hypertrophy, mass |
| Heart | <1% | Subendocardial and valvular infiltrates casing arrythmia |
